# Supplementary material for: Clinicopathologic and Endosonographic Characteristics of Colon Subepithelial Tumors Discovered Incidentally
Source: MDPI journal article supplement (doi:10.3390/diagnostics14050551), 2024-03-05
Supplement: s1 [file s1]

**Table S1.** Diagnosis rate according to each biopsy method.

|                                    | No diagnostic  | Diagnostic     |
|------------------------------------|----------------|----------------|
| Forcep biopsy                      | 17/28 (60.7%)  | 11/28 (39.3%)  |
| Bite on bite biopsy                | 1/11 (9.1%)    | 10/11 (90.9%)  |
| Endoscopic mucosal resection (EMR) | 5/66 (7.6%)    | 61/66 (92.4%)  |
| Total                              | 23/105 (21.9%) | 82/105 (78.1%) |

**Figure S1.** Patient flow chart.

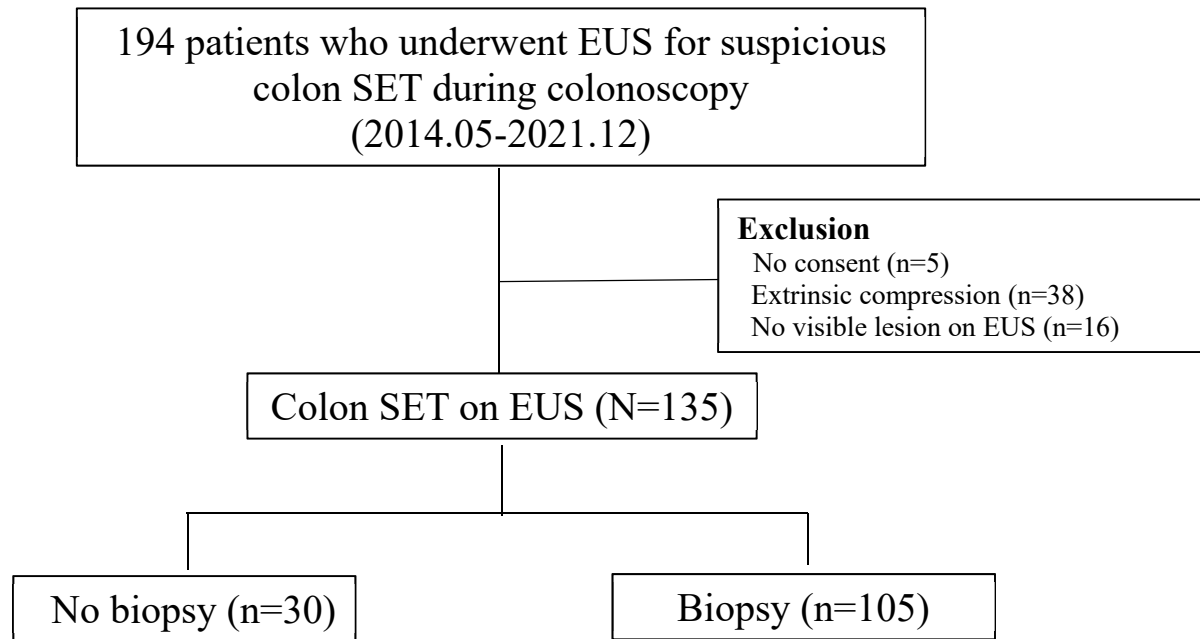

EUS: endoscopic ultrasound; SET: subepithelial tumor.
